# Supplementary material for: Catalytic antioxidant nanocomposites based on sequential adsorption of redox active metal complexes and polyelectrolytes on nanoclay particles
Source: Royal Society of Chemistry journal article supplement (doi:10.1039/d0dt04186f), 2021-01-01
Supplement: d0dt04186f1.pdf [file d0dt04186f1.pdf]

Electronic Supplementary Information (ESI)

# **Catalytic Antioxidant Nanocomposites Based on Sequential Adsorption of Redox Active Metal Complexes and Polyelectrolytes on Nanoclay Particles**

Zoltán Somosi,<sup>a</sup> Nóra V. May,<sup>b</sup> Dániel Sebők,<sup>c</sup> István Pálinkó<sup>d</sup> and István Szilágyi<sup>\*a</sup>

*<sup>a</sup>MTA-SZTE Lendület Biocolloids Research Group, Interdisciplinary Research Center, Department of Physical Chemistry and Materials Science, University of Szeged, H-6720 Szeged, Hungary*

*<sup>b</sup>Research Centre for Natural Sciences, Hungarian Academy of Sciences, H-1117 Budapest, Hungary*

*<sup>c</sup>Department of Applied and Environmental Chemistry, University of Szeged, H-6720 Szeged, Hungary*

*<sup>d</sup>Department of Organic Chemistry, University of Szeged, H-6720 Szeged, Hungary*

\*Corresponding author. Email: [szistvan@chem.u-szeged.hu](mailto:szistvan@chem.u-szeged.hu)

**Table S1.** Sample preparation methods for EPR measurements.<sup>a</sup>

| <b>Sample</b>                                                              | <b>Preparation method</b>                                                                                                                                                                                                                                                                                                     |
|----------------------------------------------------------------------------|-------------------------------------------------------------------------------------------------------------------------------------------------------------------------------------------------------------------------------------------------------------------------------------------------------------------------------|
| Cu(Bpy) <sub>2</sub> in solution                                           | 1.5 mM of CuCl <sub>2</sub> and 3 mM of Bpy mixed in water (pH ~ 7)                                                                                                                                                                                                                                                           |
| Fe(Cit) <sub>2</sub>                                                       | 1.5 mM of FeCl <sub>3</sub> and 3 mM of sodium Cit mixed in water (pH was set to 8 for 1:2 complex formation)                                                                                                                                                                                                                 |
| Cu(Bpy) <sub>2</sub> and Fe(Cit) <sub>2</sub> together in aqueous solution | 0.5 mL of 15 mM Cu(Bpy) <sub>2</sub> and 0.5 ml of 15 mM Fe(Cit) <sub>2</sub> was added into 4 mL of water                                                                                                                                                                                                                    |
| 100ppm <b>COMP</b>                                                         | 50 μL of 10000 ppm LDH solution was added into 2884 μL water, 1000 μL of 5×10 <sup>-5</sup> g/L PSS solution was added 2 h later, 33 μL of 15 mM Cu(Bpy) <sub>2</sub> was added after 4 h, 1000 μL of 5×10 <sup>-5</sup> g/L PDADMAC solution was added after 6 h and 33 μL of 15 mM Fe(Cit) <sub>2</sub> was added after 8 h |
| 400ppm <b>COMP</b>                                                         | 200 μL of 10000 ppm LDH solution was added into 4453 μL water, 40 μL of 5×10 <sup>-3</sup> g/L PSS solution was added 2 h later, 133 μL of 15 mM Cu(Bpy) <sub>2</sub> was added after 4 h, 40 μL of 5×10 <sup>-3</sup> g/L PDADMAC solution was added after 6 h and 133 μL of 15 mM Fe(Cit) <sub>2</sub> was added after 8 h  |
| 100ppm LDH-PSS-Cu(Bpy) <sub>2</sub>                                        | 50 μL of 10000 ppm LDH solution was added into 3916 μL water, 1000 μL of 5×10 <sup>-5</sup> g/L PSS solution was added 2 h later, 33 μL of 15 mM Cu(Bpy) <sub>2</sub> was added after 4 h                                                                                                                                     |
| 400ppm LDH-PSS-Cu(Bpy) <sub>2</sub>                                        | 100 μL of 10000 ppm LDH solution was added into 4726 μL water, 40 μL of 5×10 <sup>-3</sup> g/L PSS solution was added 2 h later, 133 μL of 15 mM Cu(Bpy) <sub>2</sub> was added after 4 h                                                                                                                                     |

<sup>a</sup>Final volumes for all samples were 5 mL at preparation.

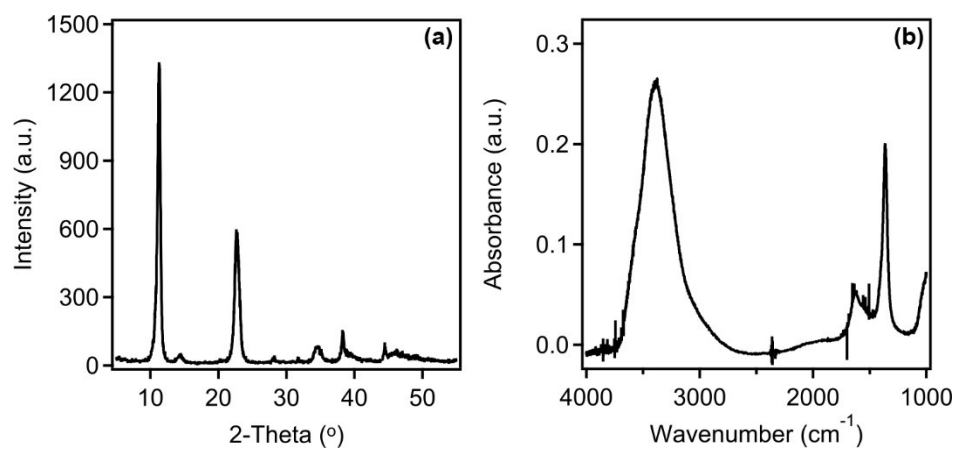

**Fig. S1** XRD diffractogram (a) and IR spectrum (b) of the LDH material used as carrier in **COMP**.

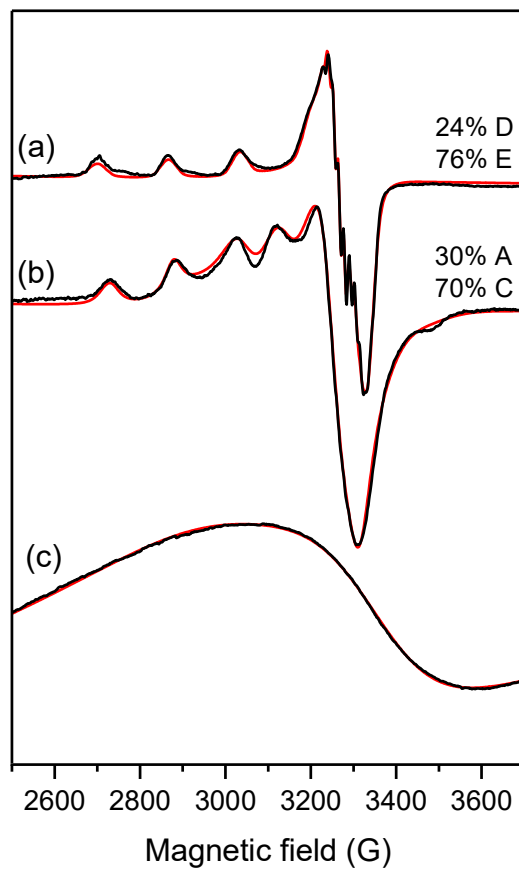

**Fig. S2** Measured (black) and simulated (red) EPR spectra of samples containing (a) 400 ppm **COMP**, (b) 400ppm LDH-PSS-Cu(Bpy)<sub>2</sub> and (c) Fe(Cit)<sub>2</sub> in aqueous solution. For details of sample preparation see Table S1 and the component spectra are shown in Figure 3.

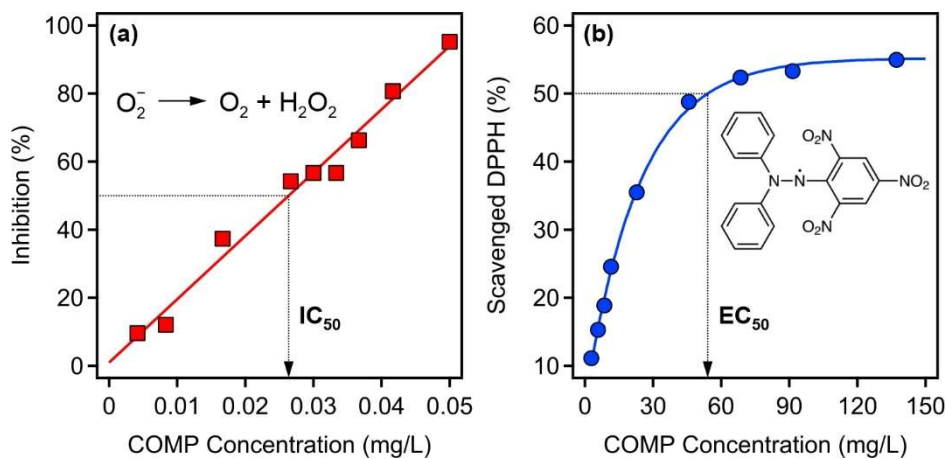

**Fig S3.** Superoxide (a) and DPPH (b) radical scavenging ability of the **COMP** hybrid. The concentrations necessary to decompose 50% of the radicals ( $IC_{50}$  (a) and  $EC_{50}$  (b)) are indicated. The solid lines are mathematical functions used to calculate the  $IC_{50}$  and  $EC_{50}$  values. The dismutation scheme for superoxide radicals and the chemical structure of DPPH are shown in the insets in (a) and (b), respectively.
